# Supplementary material for: The papain-like cysteine protease CEP1 is involved in programmed cell death and secondary wall thickening during xylem development in Arabidopsis
Source: PubMed Central journal article supplement (PMC6305193; doi:10.1093/jxb/ery356), 2018-10-30
Supplement: ery356_suppl_supplementary_figure_s1.pdf [file ery356_suppl_supplementary_figure_s1.pdf]

**The papain-like cysteine protease CEP1 is involved in programmed cell death  
and secondary wall thickening during xylem development in *Arabidopsis***

**Running title:** The function of CEP1 in xylem development

Jingyi Han<sup>1\*</sup>, Hui Li<sup>1\*</sup>, Bin Yin<sup>1\*</sup>, Yongzhuo Zhang<sup>1\*</sup>, Yadi Liu<sup>1</sup>, Ziyi Cheng<sup>1</sup>, Di Liu<sup>1</sup>, Hai Lu<sup>1,2\*\*</sup>

1. College of Biological Sciences and Biotechnology, Beijing Forestry University, Beijing, 100083, China

2. Beijing Advanced Innovation Center for Tree Breeding by Molecular Design, Beijing Forestry University, Beijing, 100083, China

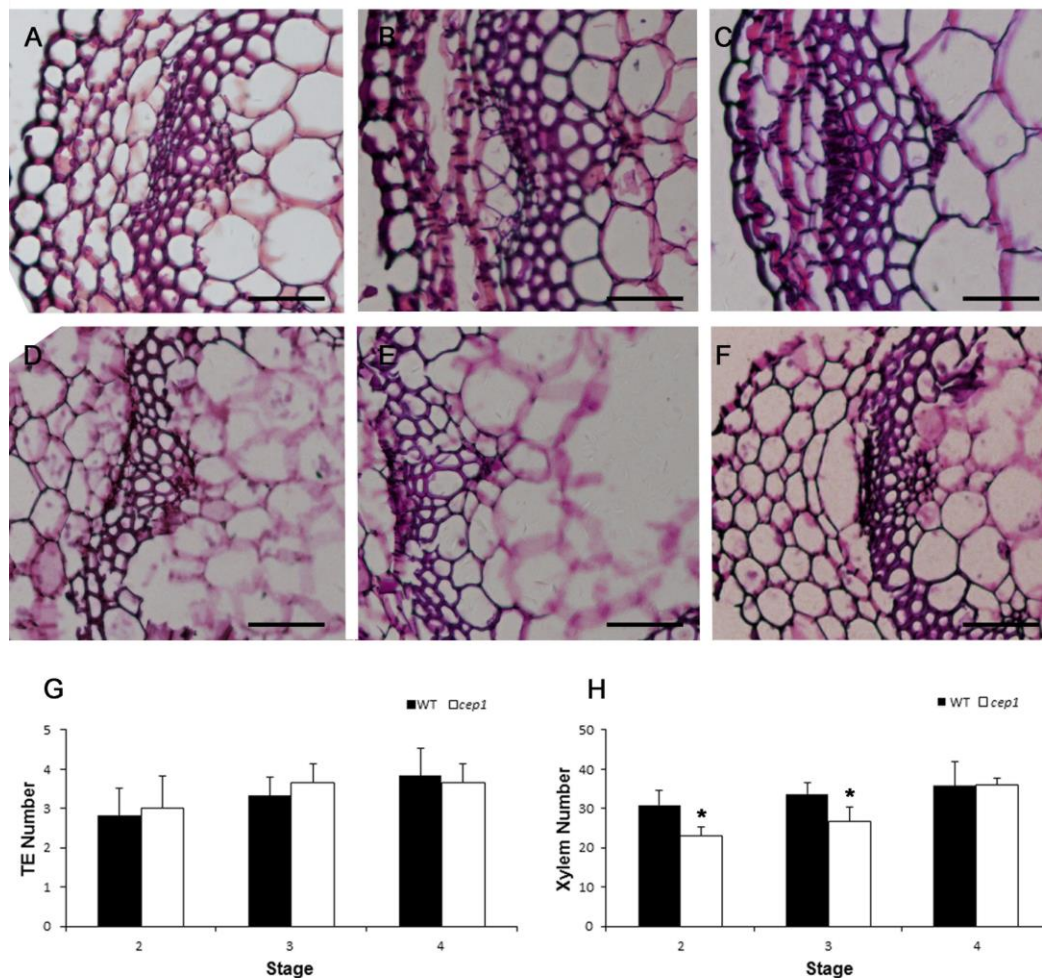

**Supplemental Figure 1.** Histological analysis of the basal nodes in *cep1-2* mutant

(SALK\_137016) compare to wild-type plants was examined. **(A–C)** Cross-section of stem vascular bundles is shown in the wild type from the early to the late stage. Scale bars = 50  $\mu\text{m}$ . **(B–F)** Cross-section of stem vascular bundles is shown in a *cep1-2* mutant plant at stage 2 **(A, D)**, stage 3 **(B, E)**, and stage 4 **(C, F)**. Scale bars = 50  $\mu\text{m}$ . **(G)** The number of tracheary elements (TEs) in wild-type and *cep1-2* plants. **(H)** The number of total xylem cells in wild-type and *cep1-2* plants.
